# Supplementary material for: Synthesis and Ex Vivo Trans-Corneal Permeation of Penetratin Analogues as Ophthalmic Carriers: Preliminary Results
Source: PubMed Central journal article supplement (PMC7466059; doi:10.3390/pharmaceutics12080728), 2020-08-03
Supplement: pharmaceutics-12-00728-s001.pdf [file pharmaceutics-12-00728-s001.pdf]

# Supplementary Materials: Synthesis and Ex Vivo Trans-Corneal Permeation of Penetratin Analogues as Ophthalmic Carriers: Preliminary Results

Silvia Pescina, Marina Sala, Maria Carmina Scala, Patrizia Santi, Cristina Padula, Pietro Campiglia, Carmine Ostacolo and Sara Nicoli

Table S1. Analytical data of synthesized peptides.

| Peptide                    | Sequence                | HPLC            |                                  | ESI-MS            |   |
|----------------------------|-------------------------|-----------------|----------------------------------|-------------------|---|
|                            |                         | k' <sup>a</sup> | Precursor ion (m/z) <sup>b</sup> | Product ion (m/z) | z |
| PNT                        | FAM-RQIKIWFQNRRMKWKK    | 12.89           | 2604.61                          | 868.83            | 3 |
|                            |                         |                 |                                  | 651.85            | 4 |
|                            |                         |                 |                                  | 521.69            | 5 |
| PNT-GG                     | FAM-GG-RQIKIWFQNRRMKWKK | 7.33            | 2718.18                          | 906.82            | 3 |
|                            |                         |                 |                                  | 680.36            | 4 |
|                            |                         |                 |                                  | 544.48            | 5 |
| PNT-GG 1                   | FAM-GG-NRRMKWKK         | 9.02            | 1617.85                          | 809.35            | 2 |
|                            |                         |                 |                                  | 539.89            | 3 |
|                            |                         |                 |                                  | 405.17            | 4 |
| PNT-GG 2                   | FAM-GG-FQNRRMKW         | 8.05            | 1636.80                          | 818.84            | 2 |
|                            |                         |                 |                                  | 546.22            | 3 |
| PNT-GG 3                   | FAM-GG-IWFQNRRM         | 7.87            | 1621.79                          | 811.31            | 2 |
|                            |                         |                 |                                  | 541.21            | 3 |
| PNT-GG 4                   | FAM-GG-IKIWFQNR         | 11.51           | 1575.74                          | 788.26            | 2 |
|                            |                         |                 |                                  | 525.85            | 3 |
| PNT-GG 5                   | FAM-GG-RQIKIWFQ         | 9.06            | 1589.77                          | 1590.20           | 1 |
|                            |                         |                 |                                  | 906.70            | 3 |
| PNT-R                      | FAM-GG-KKWKMRRNQFWIKIQR | 7.31            | 2718.18                          | 680.70            | 4 |
|                            |                         |                 |                                  | 544.40            | 5 |
|                            |                         |                 |                                  | 1590.22           | 1 |
| PNT-R 1                    | FAM-GG-QFWIKIQR         | 9.10            | 1589.01                          | 796.13            | 2 |
|                            |                         |                 |                                  |                   |   |
| PNT-R 2                    | FAM-GG-RNQFWIKI         | 11.45           | 1575.68                          | 1575.62           | 1 |
|                            |                         |                 |                                  | 789.08            | 2 |
| PNT-R 3                    | FAM-GG-MRRNQFWI         | 7.84            | 1622.75                          | 1622.72           | 1 |
|                            |                         |                 |                                  | 812.21            | 2 |
| PNT-R 4                    | FAM-GG-WKMRRNQF         | 8.01            | 1636.81                          | 819.20            | 2 |
|                            |                         |                 |                                  |                   |   |
| PNT-R 5                    | FAM-GG-KKWKMRRN         | 8.99            | 1617.85                          | 809.23            | 2 |
|                            |                         |                 |                                  | 540.01            | 3 |
|                            |                         |                 |                                  | 405.22            | 4 |
| PNT-R-FL                   | FL-GG-KKWKMRRNQFWIKIQR  | 12.48           | 2673.65                          | 1337.60           | 2 |
|                            |                         |                 |                                  | 892.10            | 3 |
| PNT-R 4-FL<br>PNT-R-4-FL 4 | FL-GG-WKMRRNQF          | 6.77            | 1592.96                          | 1593.23           | 1 |

<sup>a</sup> k'=[(peptide retention time-solvent retention time)/solvent retention time]. <sup>b</sup> calculated.

**Table S2.** Range of calibration curves, RSD% (relative standard deviation %) and ER% (relative error %).

| <b>Peptide</b> | <b>Linearity range (nM)</b> | <b>RSD%</b> | <b>ER%</b> |
|----------------|-----------------------------|-------------|------------|
| PNT            | 10-100                      | 5           | 10         |
| PNT-GG         | 10-100                      | 10          | 15         |
| PNT-GG 1       | 100-500                     | 10          | 15         |
| PNT-GG 2       | 5-100                       | 10          | 15         |
| PNT-GG 3       | 1-100                       | 5           | 5          |
| PNT-GG 4       | 10-100                      | 10          | 15         |
| PNT-GG 5       | 5-100                       | 10          | 15         |
| PNT-R          | 25-100                      | 10          | 15         |
| PNT-R 1        | 10-100                      | 10          | 15         |
| PNT-R 2        | 10-50                       | 10          | 15         |
| PNT-R 3        | 0.5-5                       | 10          | 15         |
| PNT-R 4        | 5-100                       | 10          | 10         |
| PNT-R 5        | 0.5-25                      | 10          | 15         |

Supplementary figures of Mass spectrometry and HPLC of peptides used in the study

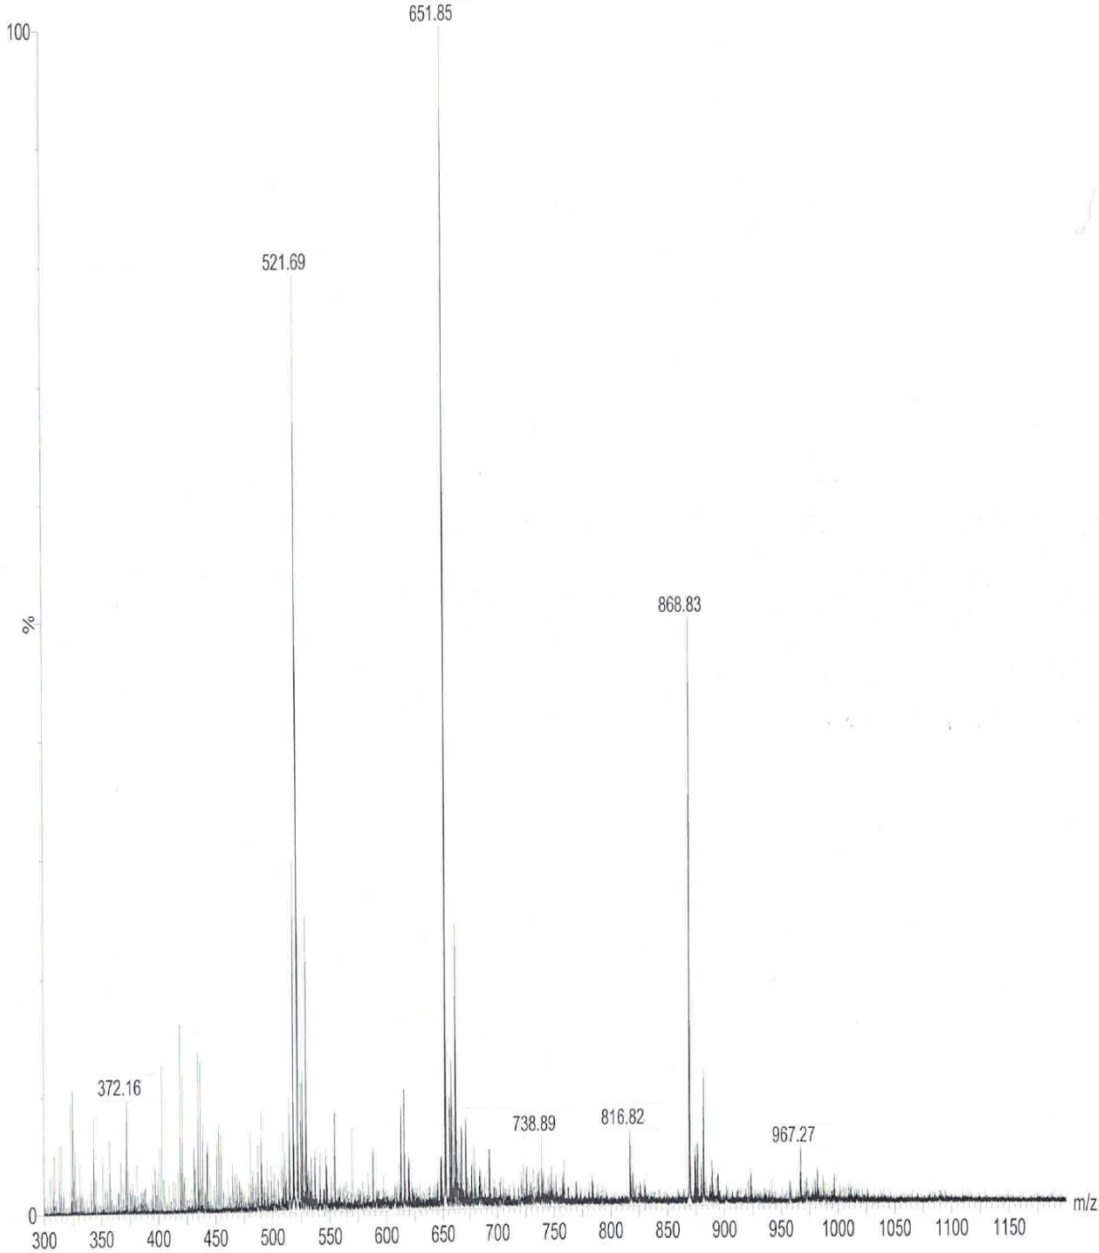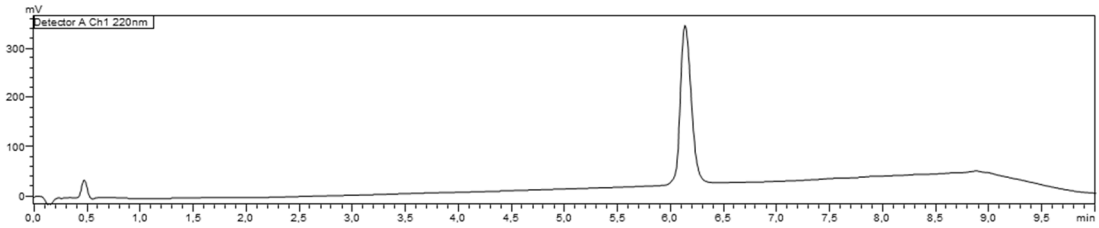

Figure S1. ESI-MS of PNT and analytical HPLC trace at 220 nm.

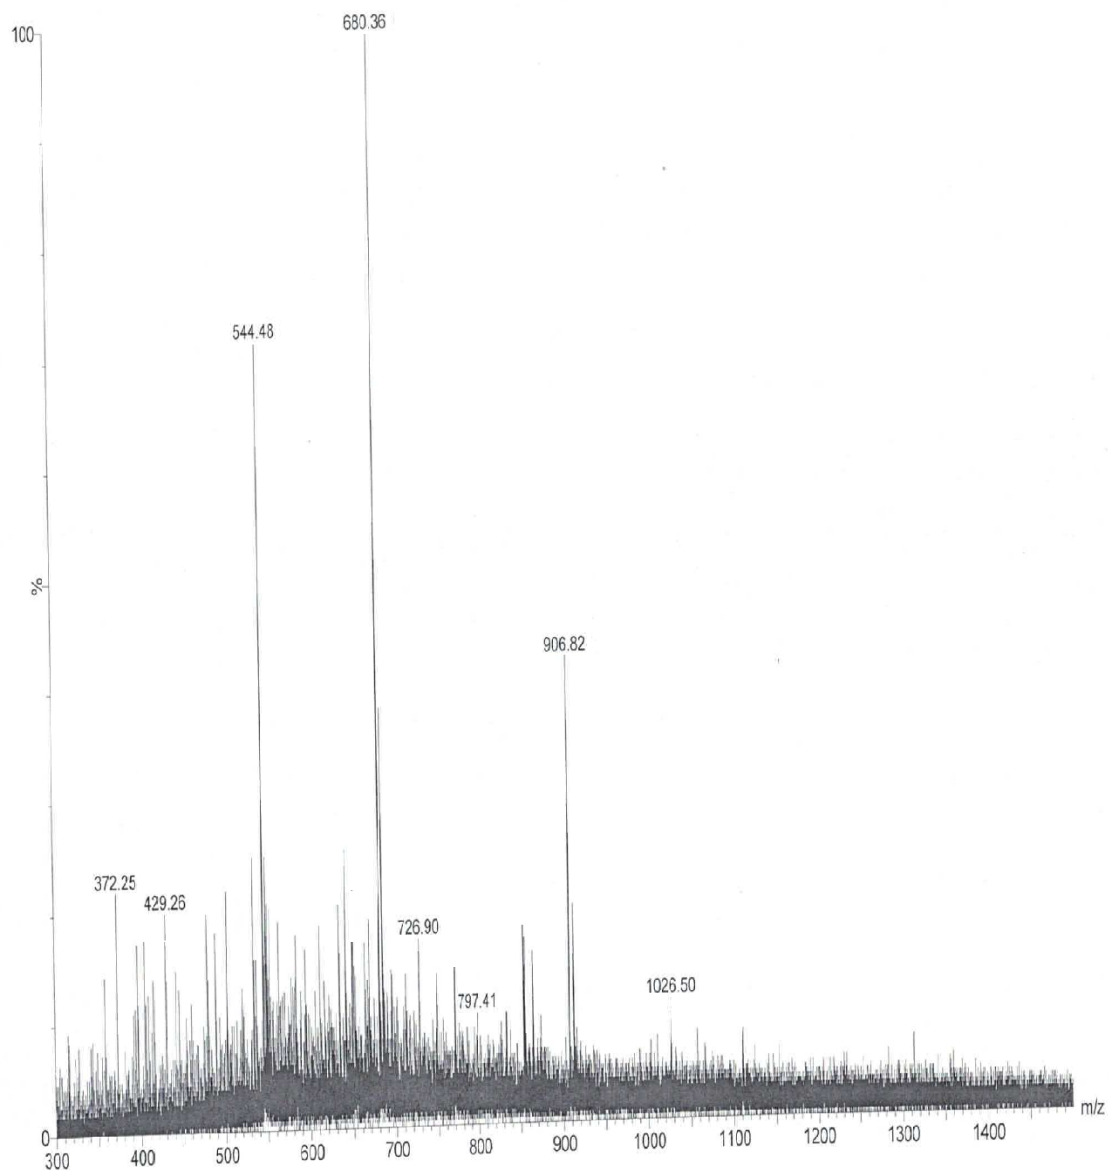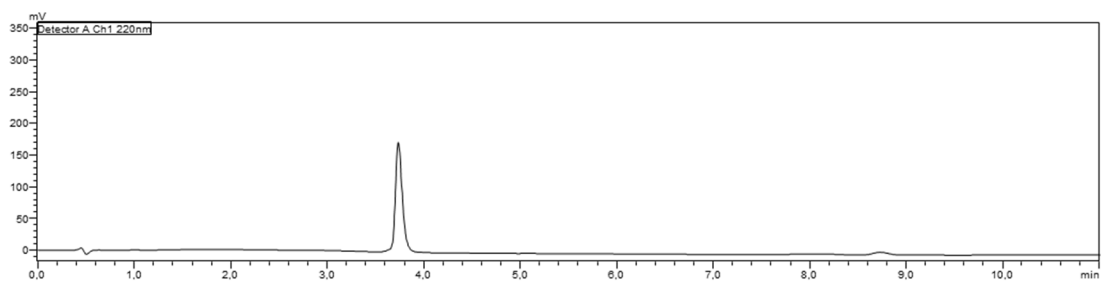

**Figure S2.** ESI-MS of PNT-GG and analytical HPLC trace at 220 nm.

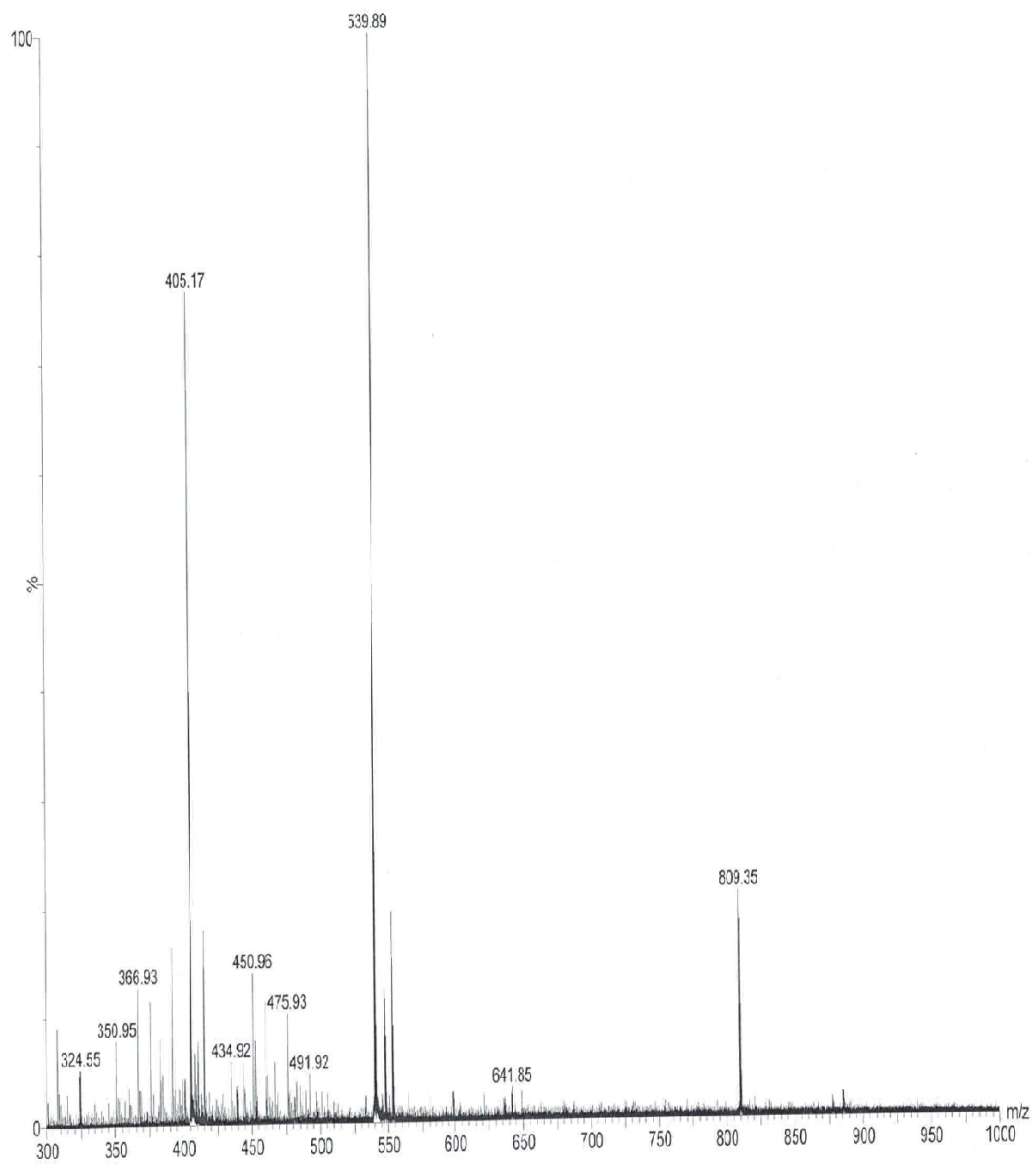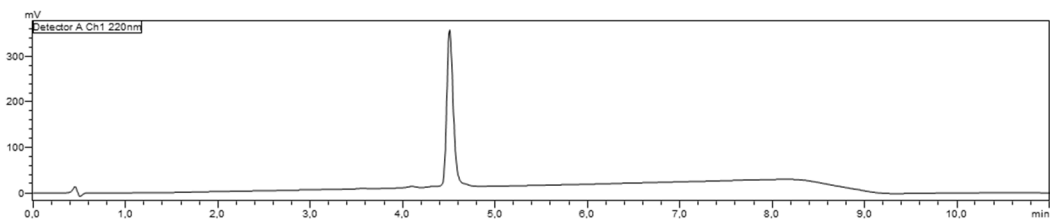

**Figure S3.** ESI-MS of PNT-GG 1 and analytical HPLC trace at 220 nm.

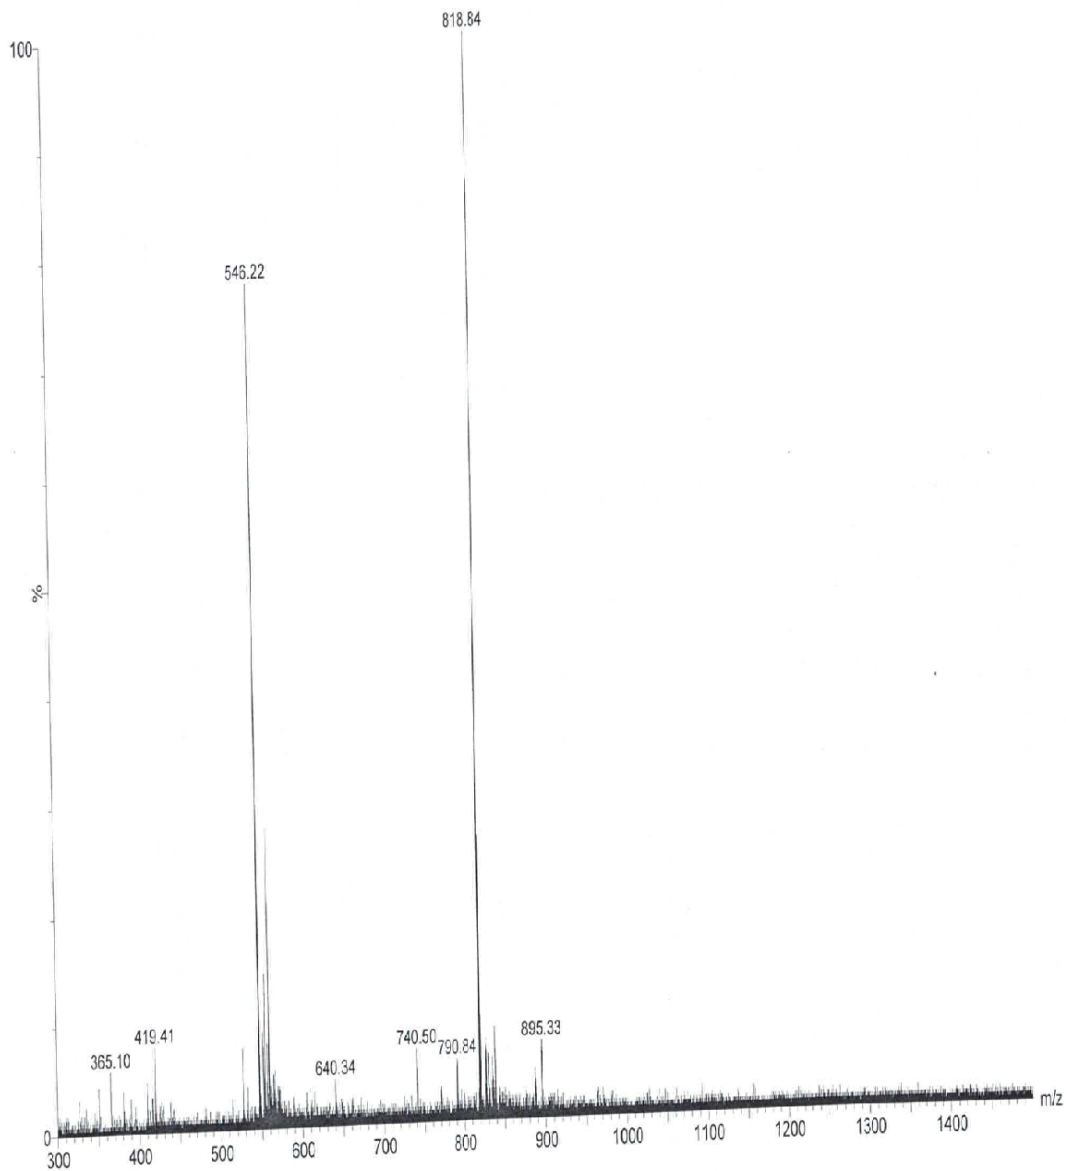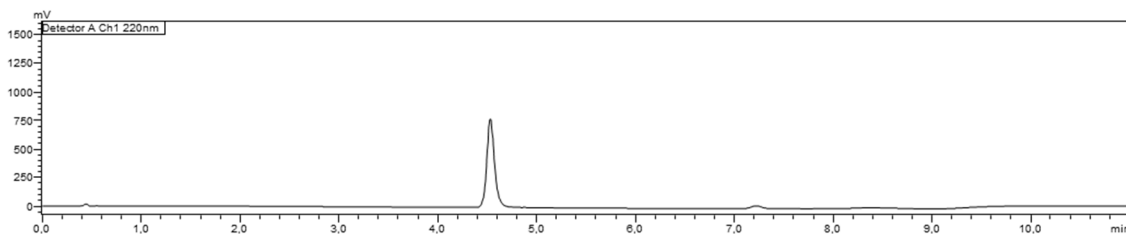

**Figure S4.** ESI-MS of PNT-GG 2 and analytical HPLC trace at 220 nm.

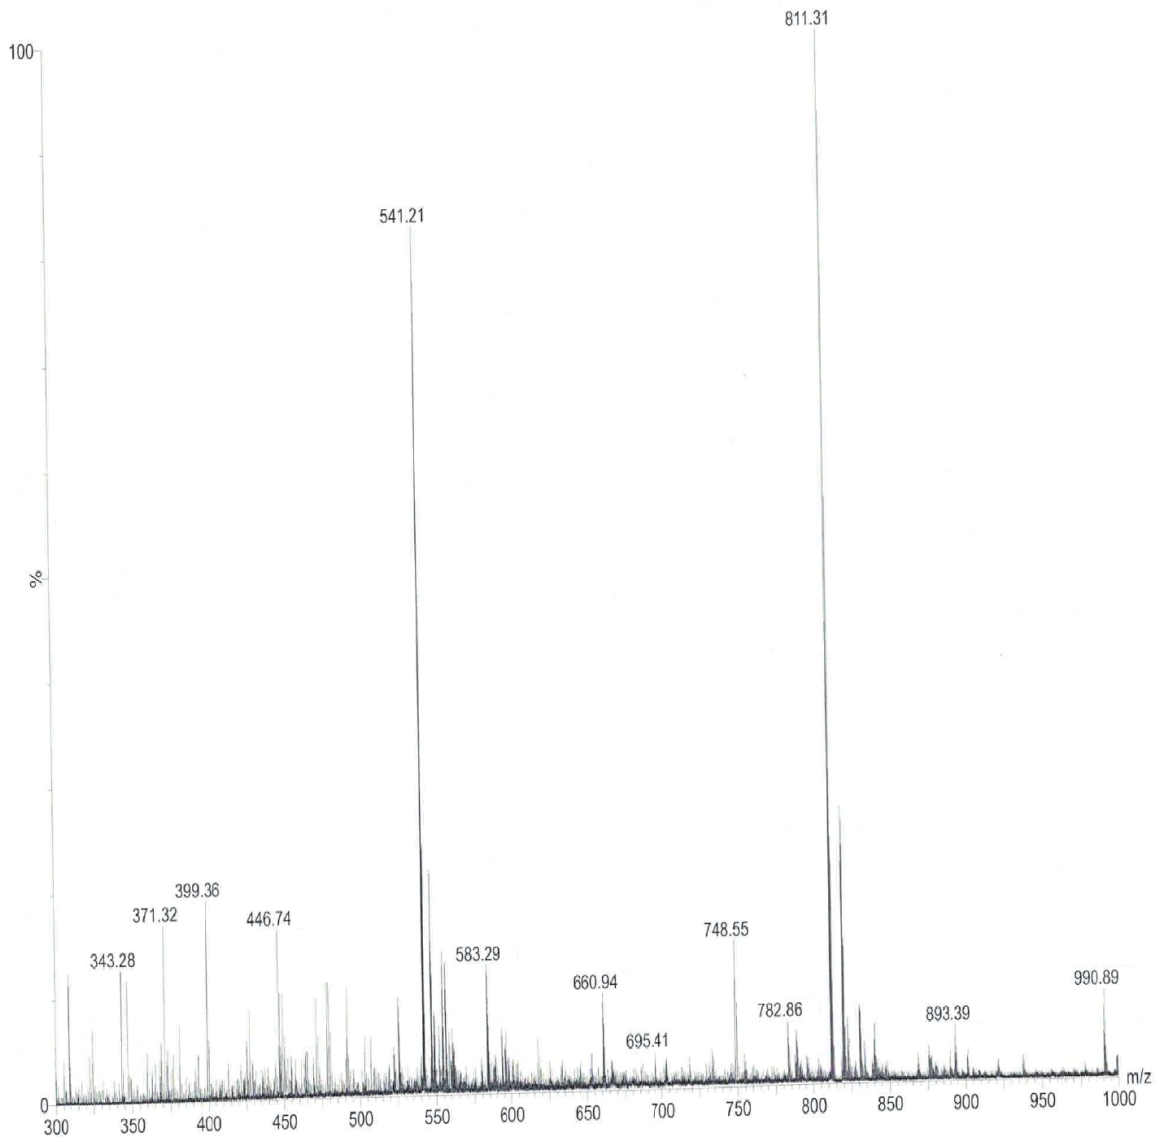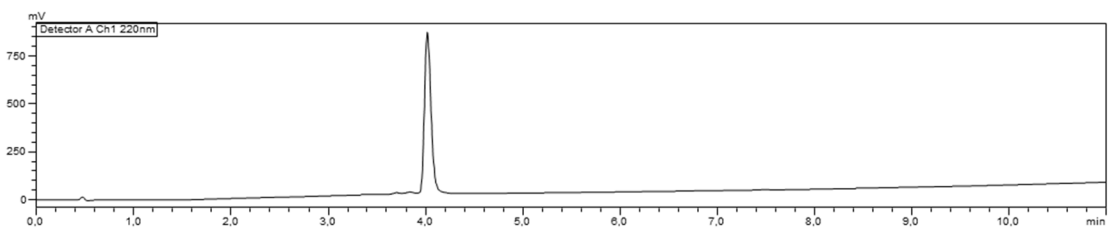

**Figure S5.** ESI-MS of PNT-GG 3 and analytical HPLC trace at 220 nm.

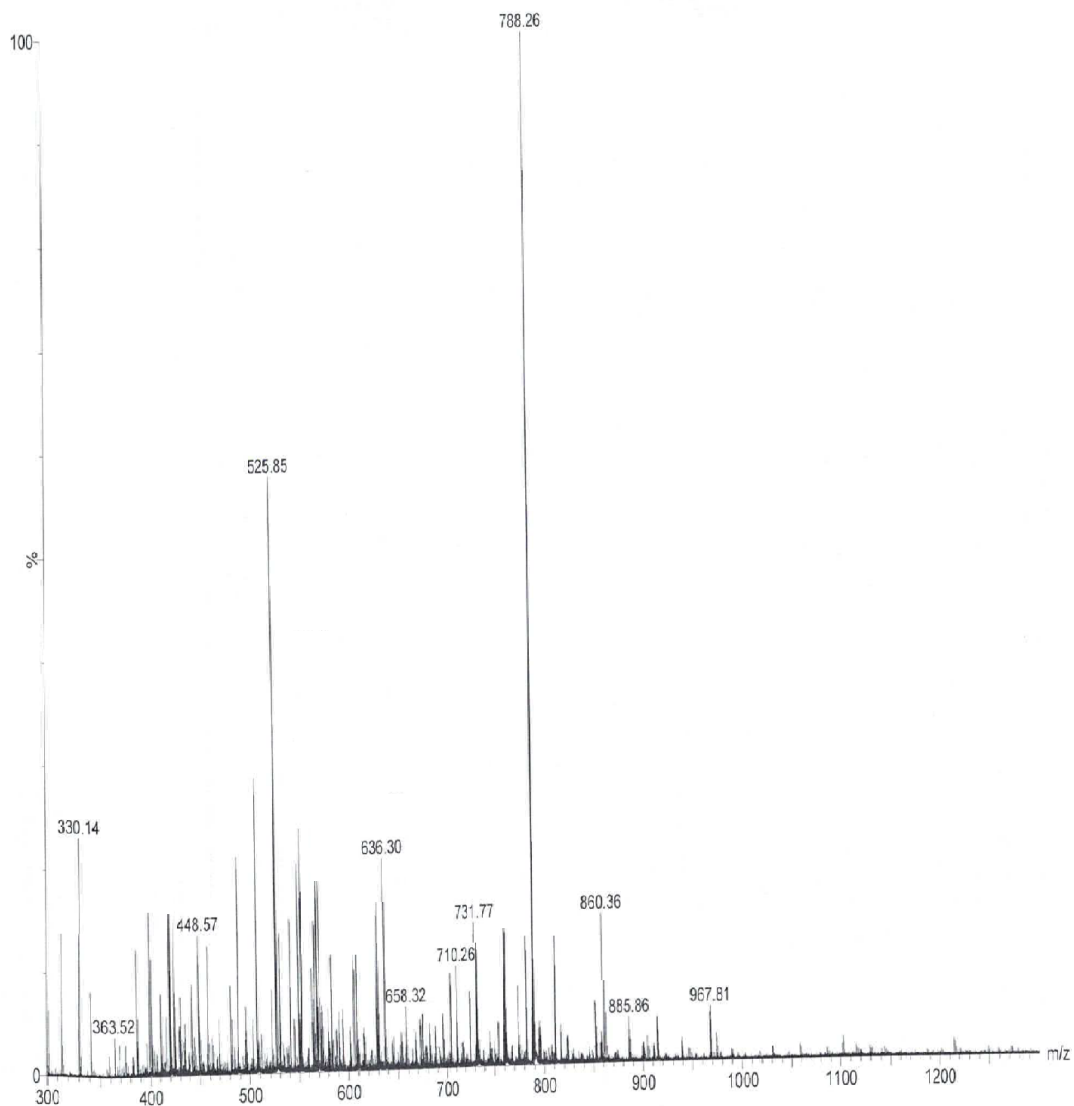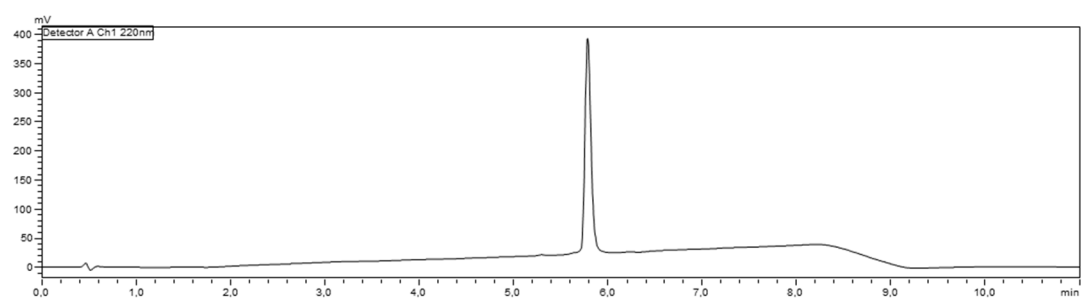

**Figure S6.** ESI-MS of PNT-GG 4 and analytical HPLC trace at 220 nm.



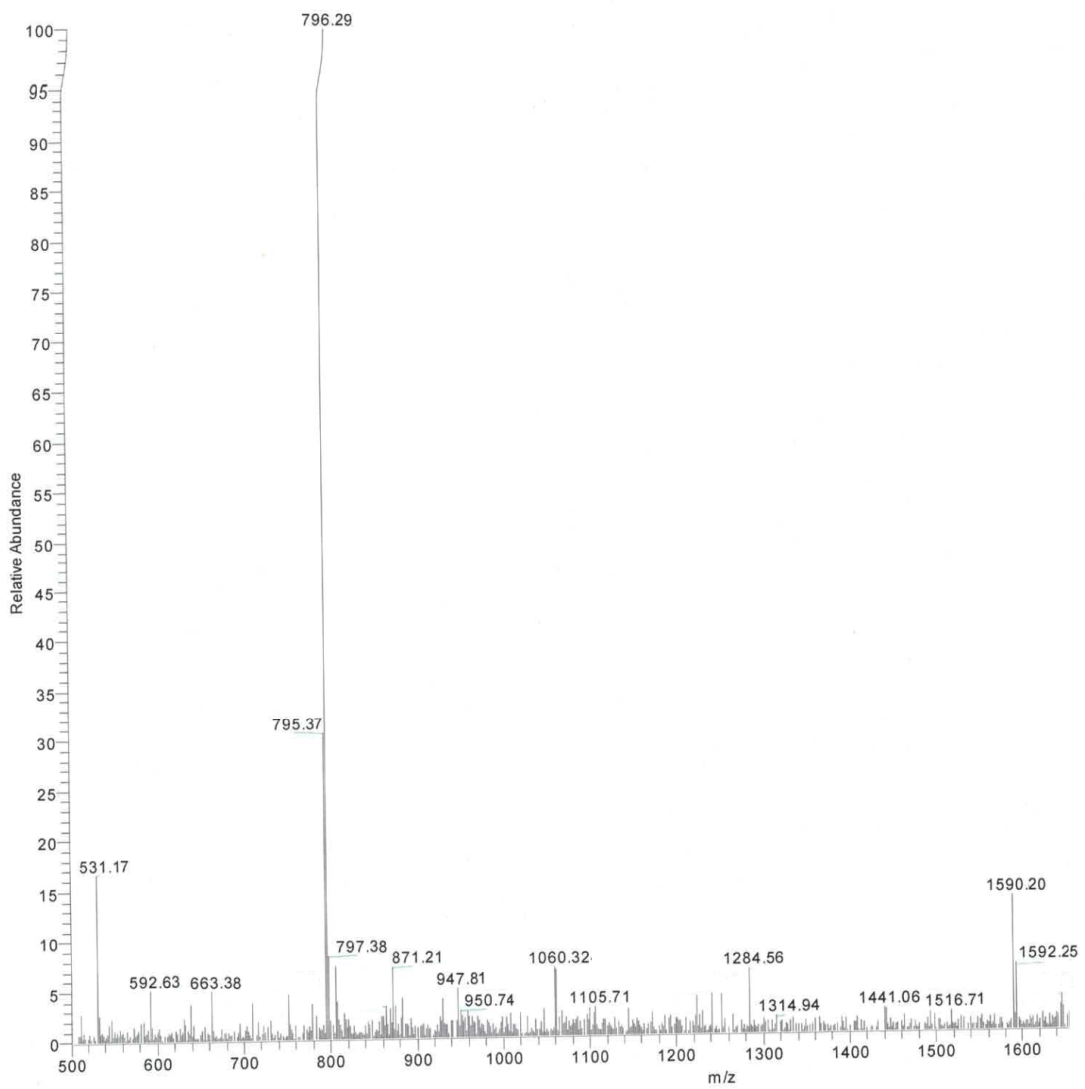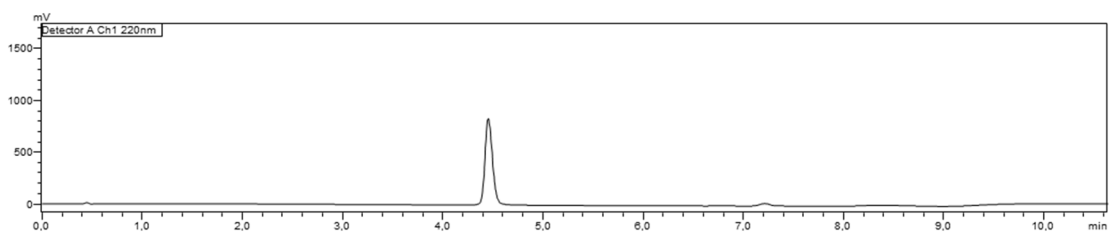

Figure S7. ESI-MS of PNT-GG 5 and analytical HPLC trace at 220 nm.

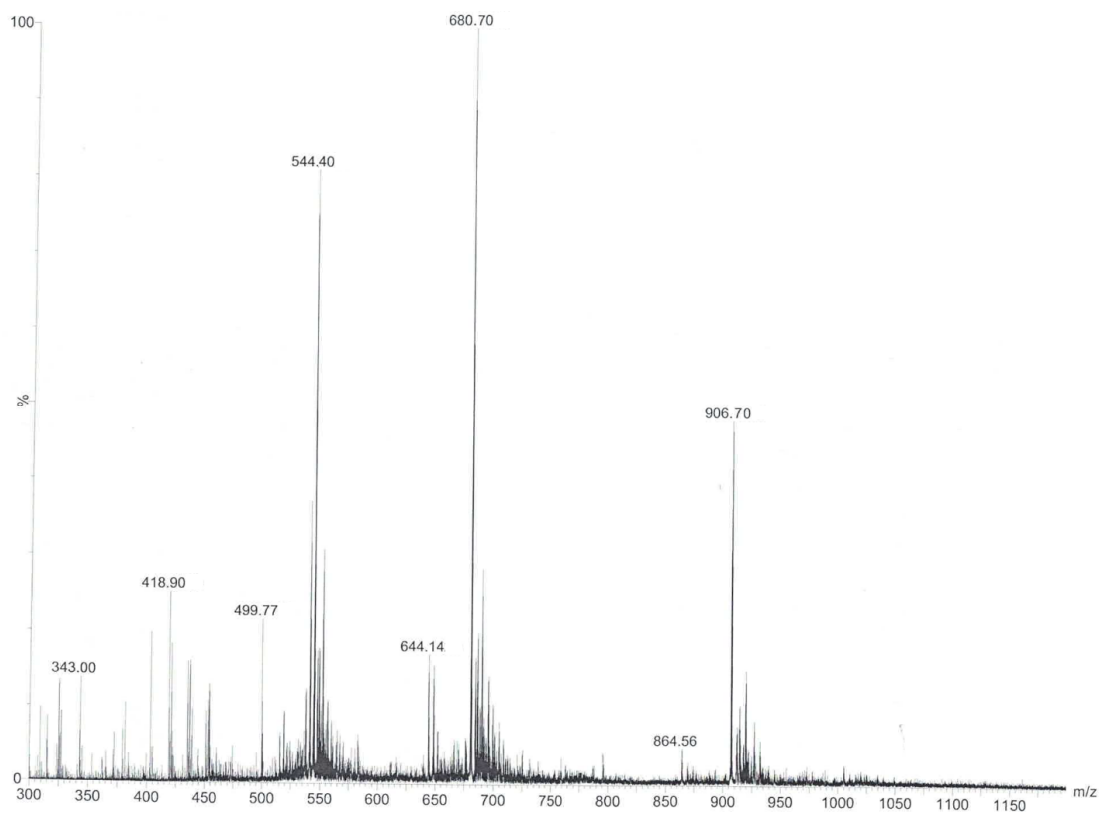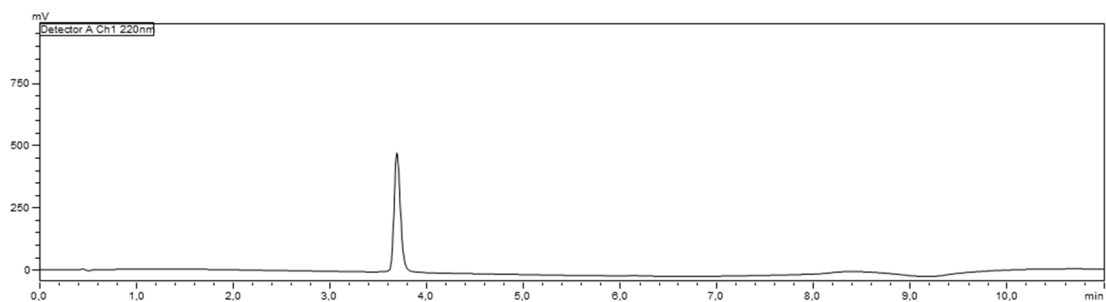

Figure S8. ESI-MS of PNT-R and analytical HPLC trace at 220 nm.

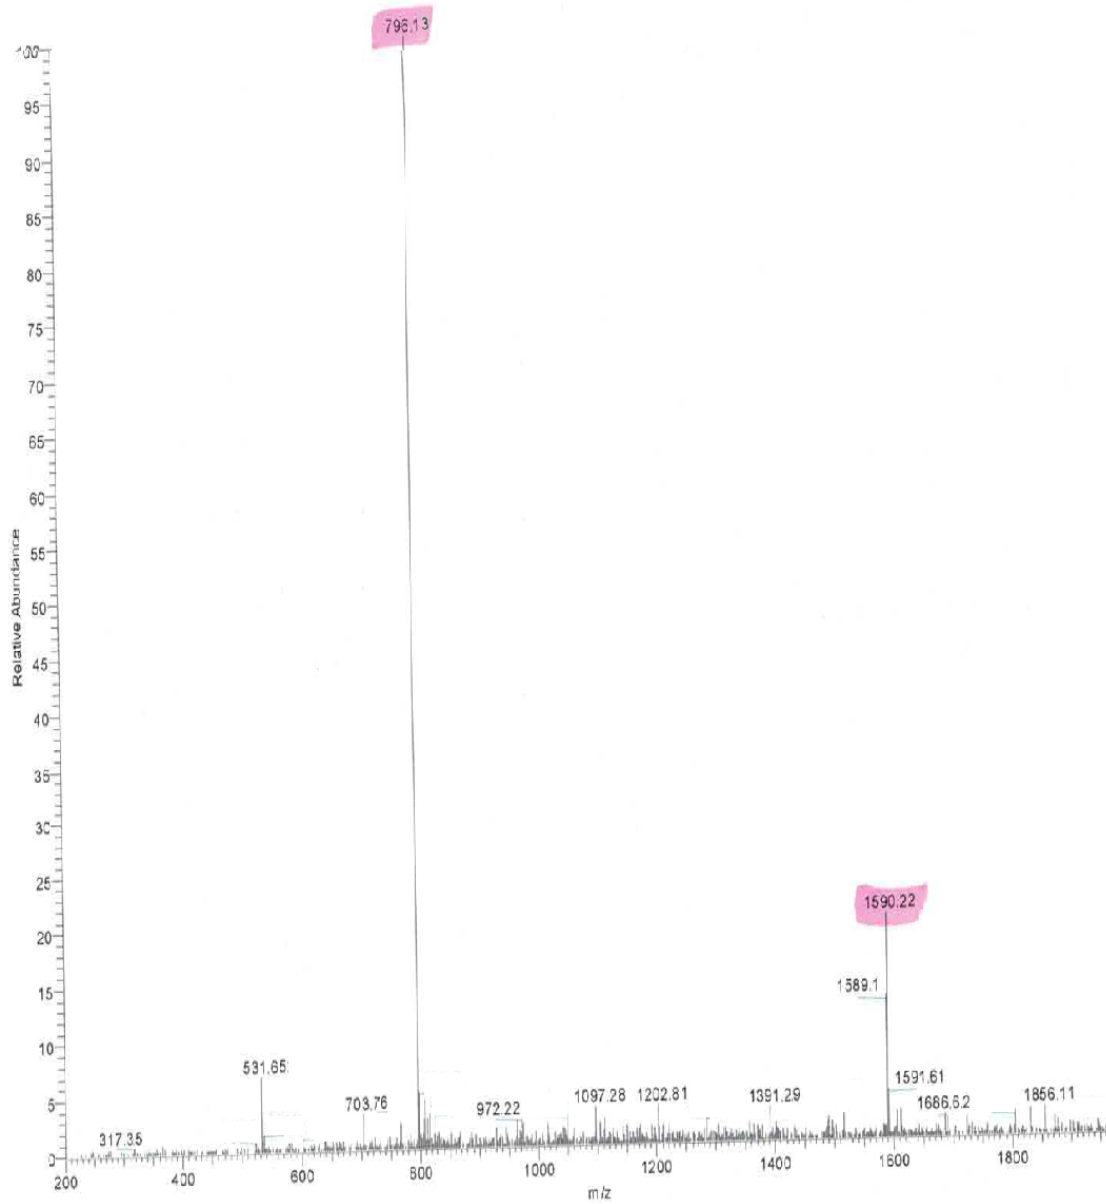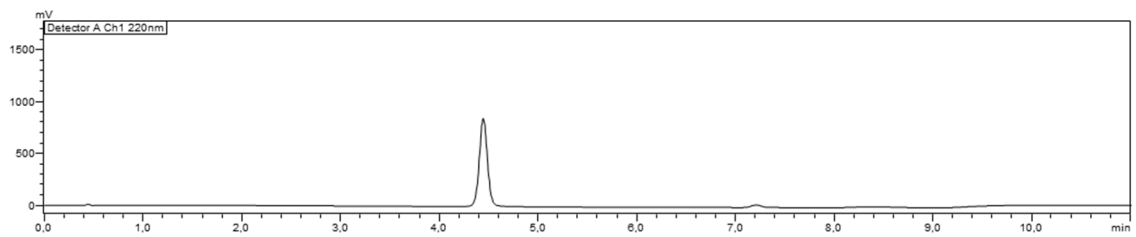

Figure S9. ESI-MS of PNT-R 1 and analytical HPLC trace at 220 nm.

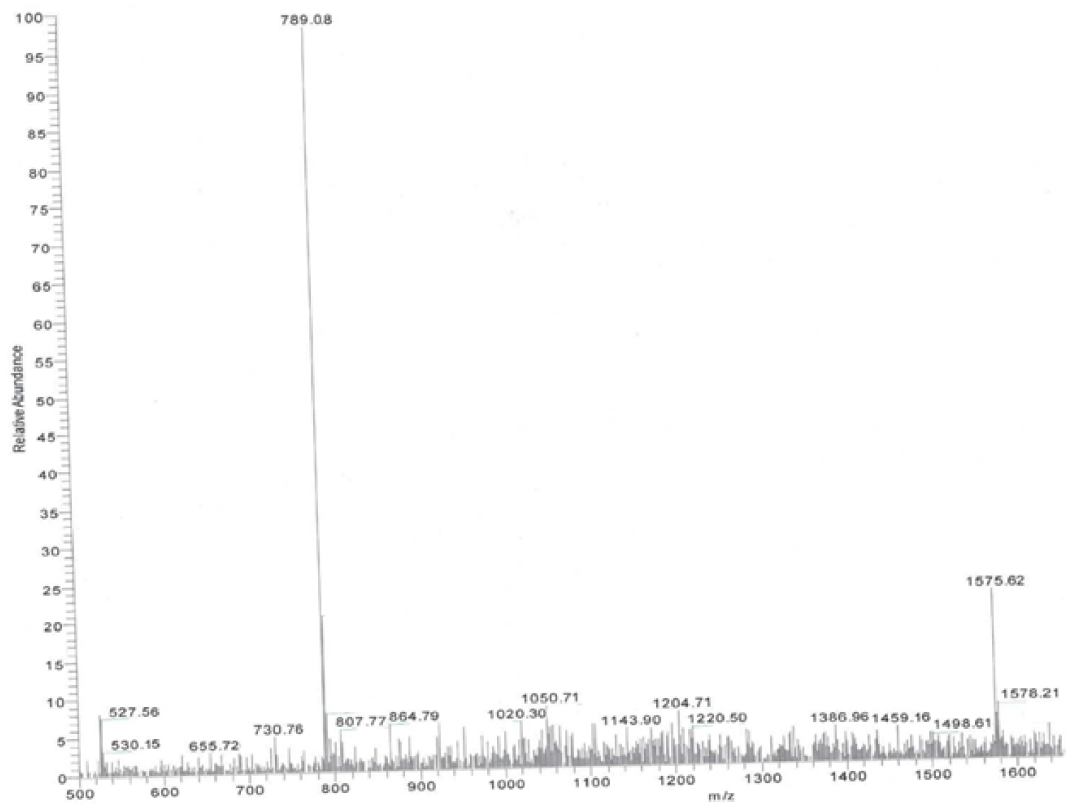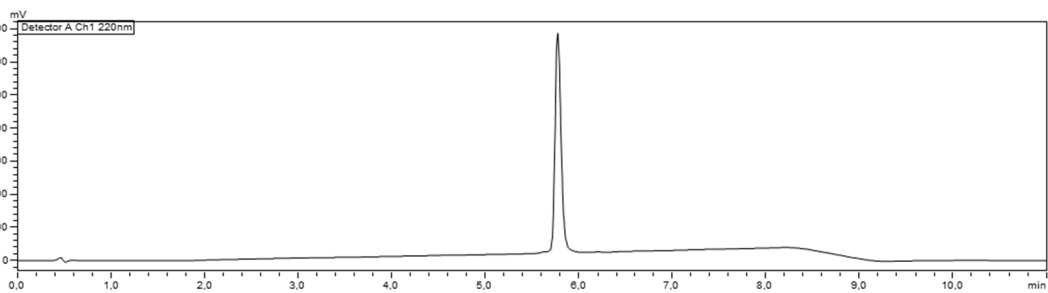

Figure S10. ESI-MS of PNT-R 2 and analytical HPLC trace at 220 nm.

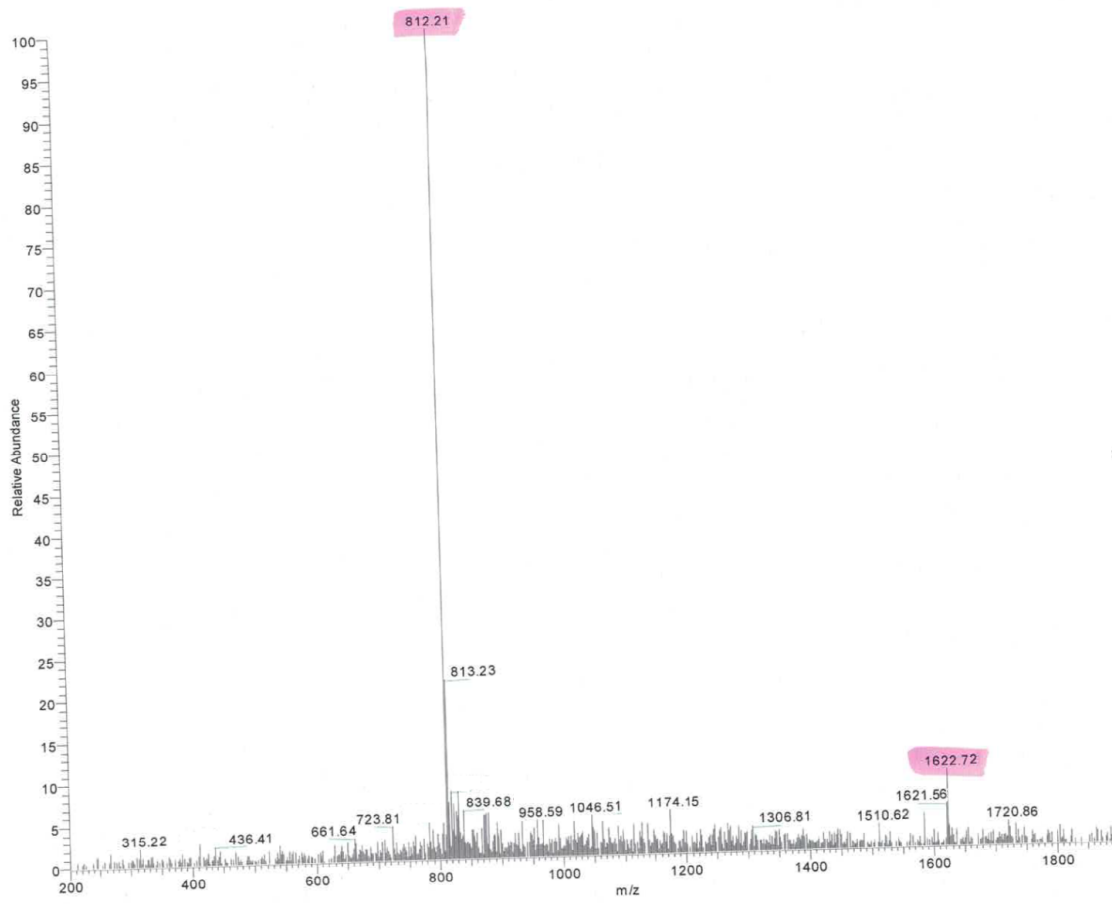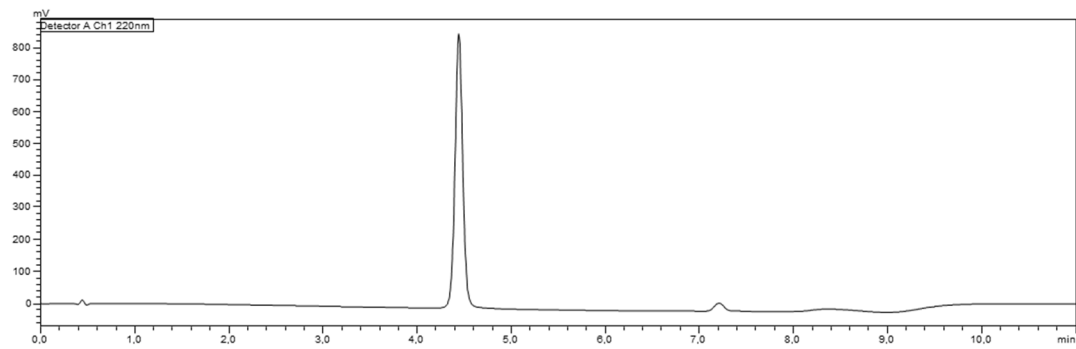

Figure S11. ESI-MS of PNT-R 3 and analytical HPLC trace at 220 nm.

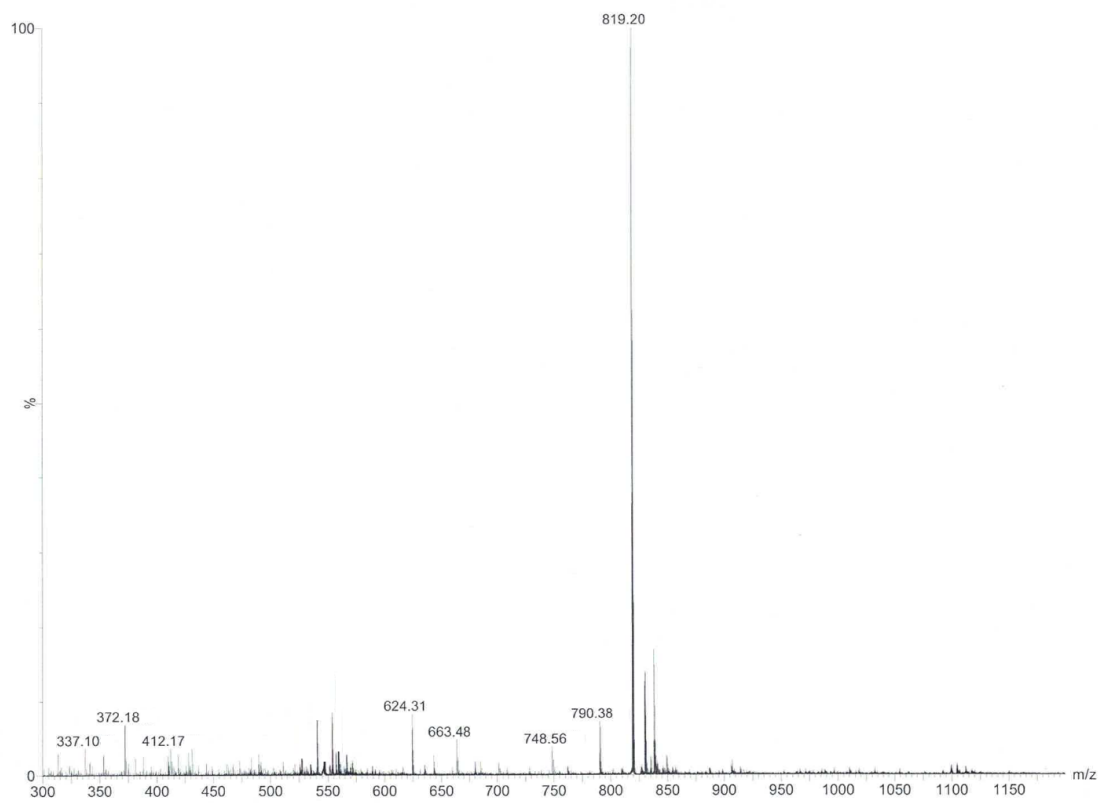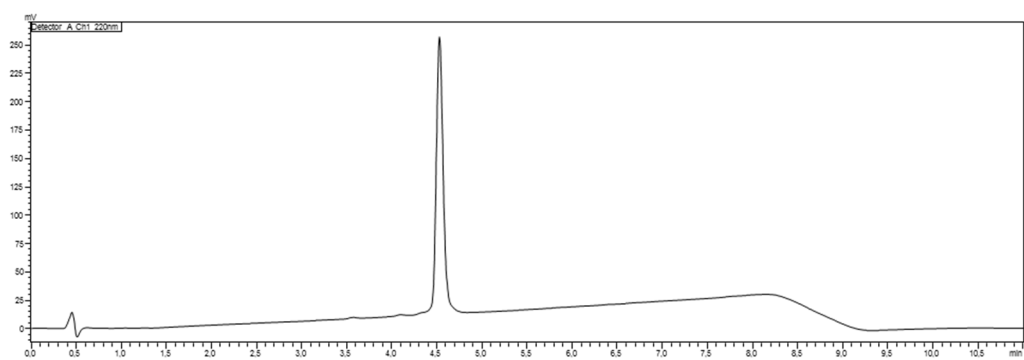

**Figure S12.** ESI-MS of PNT-R 4 and analytical HPLC trace at 220 nm.

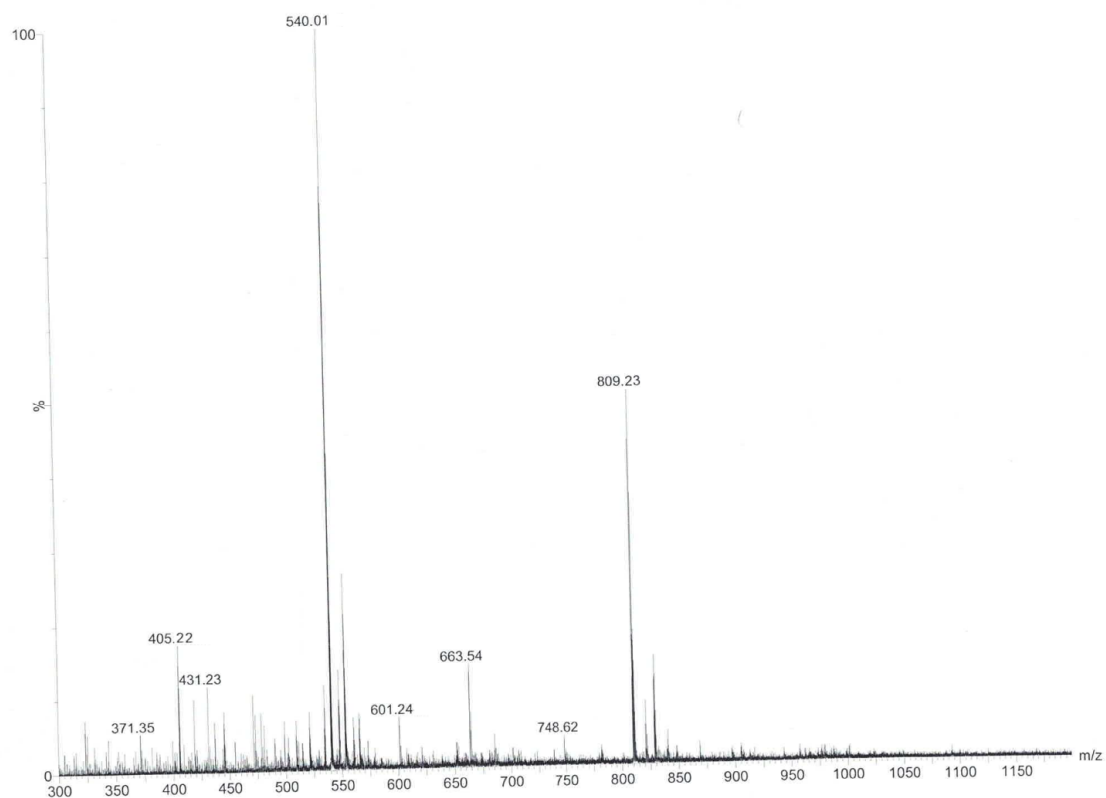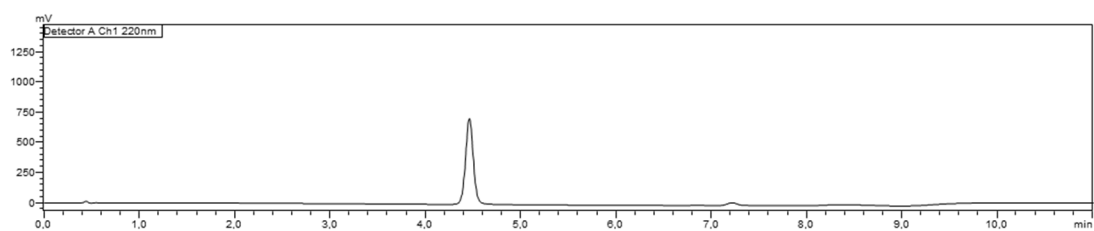

**Figure S13.** ESI-MS of PNT-R 5 and analytical HPLC trace at 220 nm.

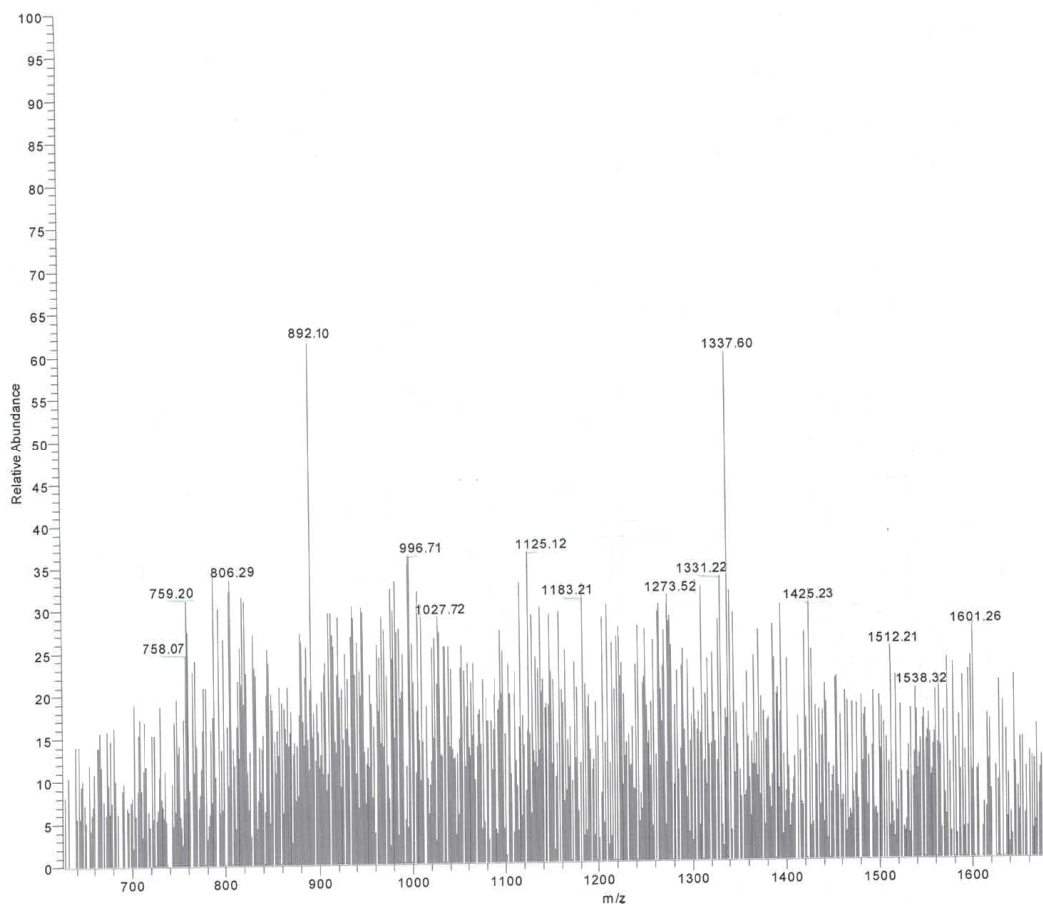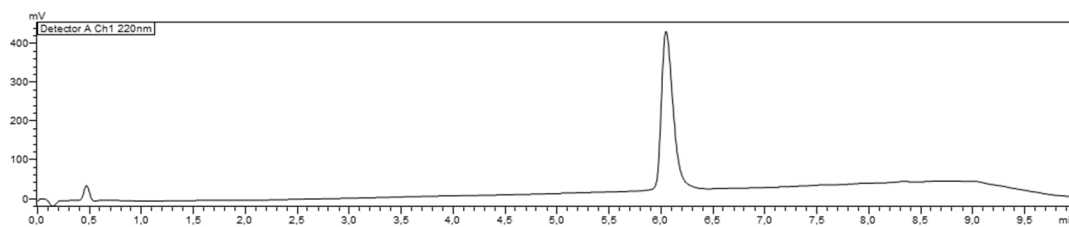

**Figure S14.** ESI-MS of PNT-R-FL and analytical HPLC trace at 220 nm.



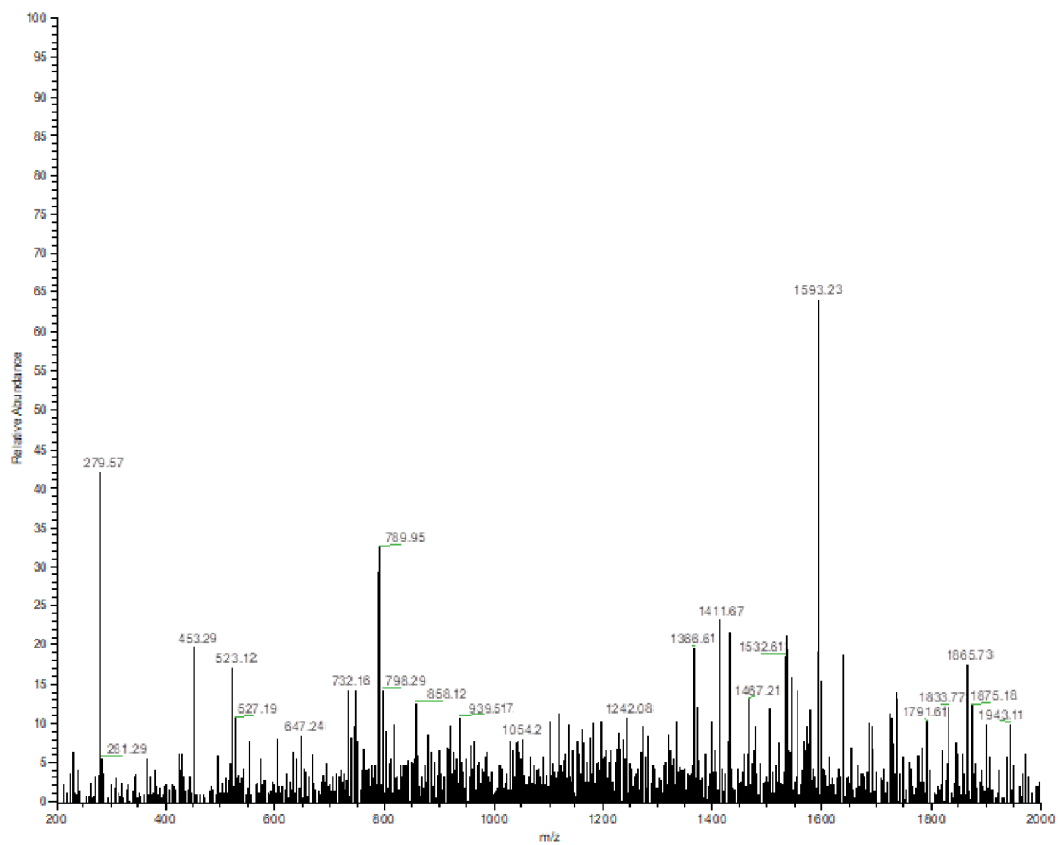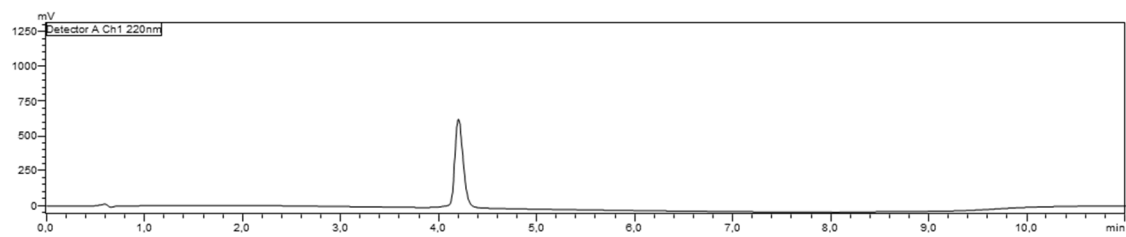

Figure S15. ESI-MS of PNT-R 4-FL and analytical HPLC trace at 220 nm.
